# Supplementary material
Source: Springer Nature journal article supplement (https://www.springermedizin.de/resource/supplementary/12987_2009_428_MOESM2_ESM.pdf/9612018)

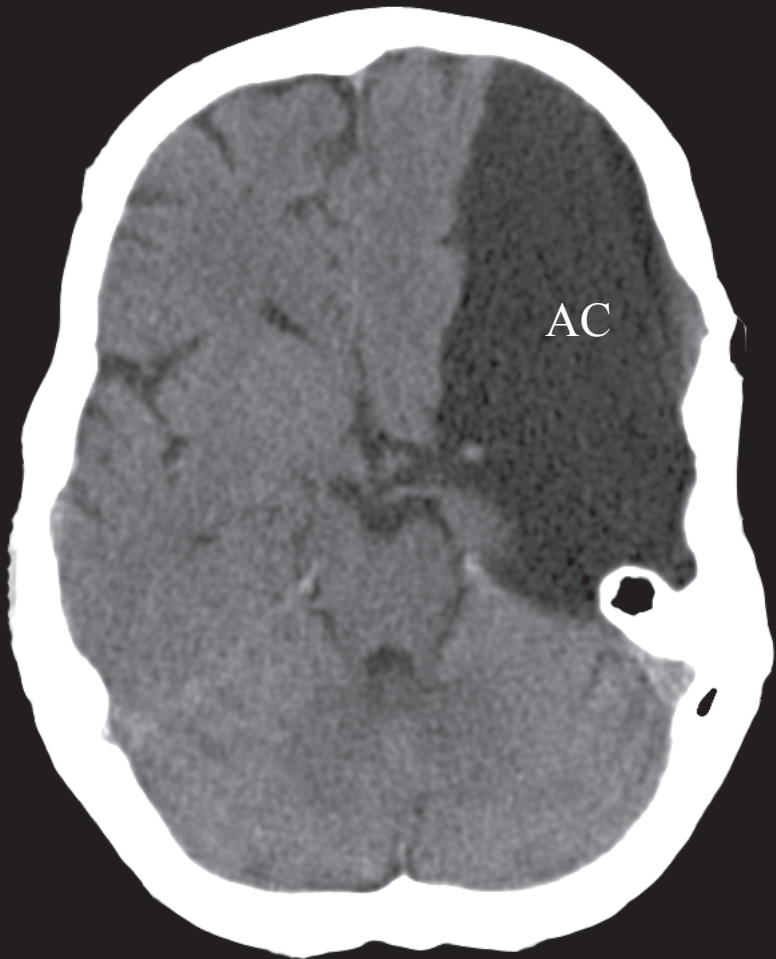

Supplement: MOESM2 [file 9612018]
